# Supplementary material for: Generation of hierarchical pore systems in the titanosilicate ETS-10 by hydrogen peroxide treatment under microwave irradiation
Source: Royal Society of Chemistry journal article supplement (doi:10.1039/b515720j), 2006-01-01
Supplement: b515720j.pdf [file b515720j.pdf]

## Supplementary data

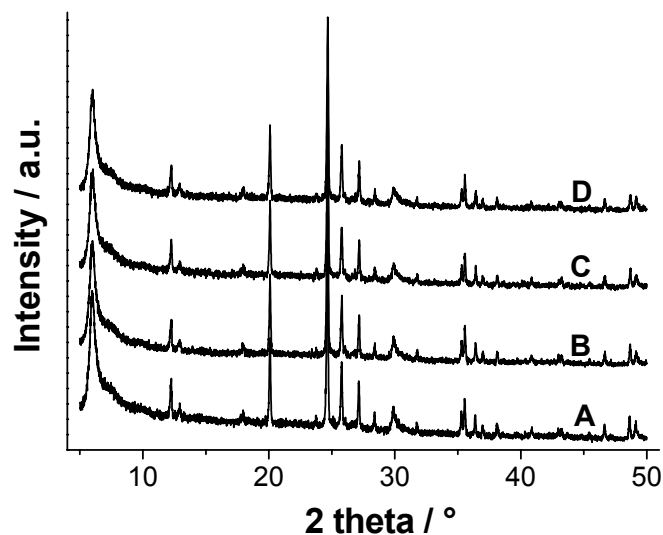

**Fig. 1** X-ray powder diffraction patterns of as-made ETS-10 (A) and 10 wt. % H<sub>2</sub>O<sub>2</sub>/ETS-10 (B), 20 wt. % H<sub>2</sub>O<sub>2</sub>/ETS-10 (C), 30 wt. % H<sub>2</sub>O<sub>2</sub>/ETS-10 (D) samples treated under microwave irradiation.

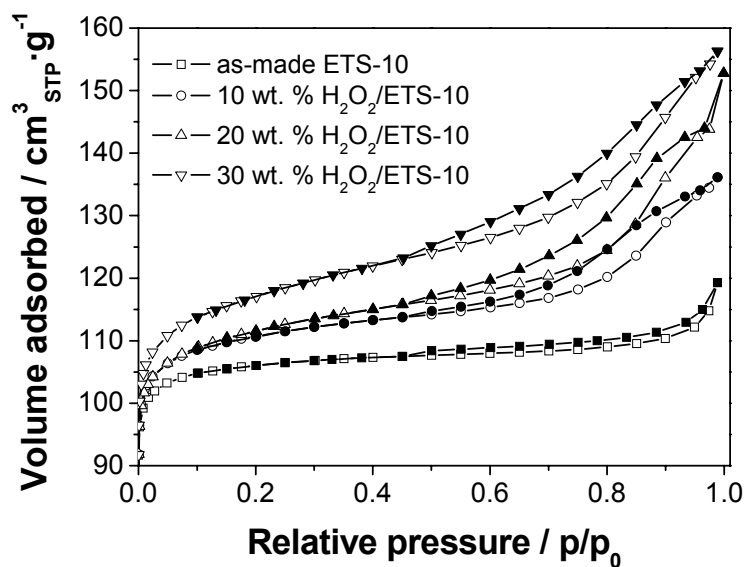

**Fig. 2** Nitrogen adsorption/desorption isotherms of as-made and treated ETS-10 samples.
